# Supplementary material for: Efficient fractionation and analysis of ribosome assembly intermediates in human cells
Source: PubMed Central journal article supplement — RNA Biol. 2021 Sep 17;18(Suppl 1):182–97. doi: 10.1080/15476286.2021.1965754 (PMC8682975; doi:10.1080/15476286.2021.1965754), 2021-09-17
Supplement: KRNB_A_1965754_SM0310.pdf [file KRNB_A_1965754_SM0310.pdf]

## **Supplemental Material**

### **EFFICIENT FRACTIONATION AND ANALYSIS OF RIBOSOME ASSEMBLY INTERMEDIATES IN HUMAN CELLS**

Supplementary Figure S1  
Supplementary Figure S2  
Supplementary Table 1  
Supplementary Table 2  
Supplementary Table 3  
Supplementary Table 4

Figure S1

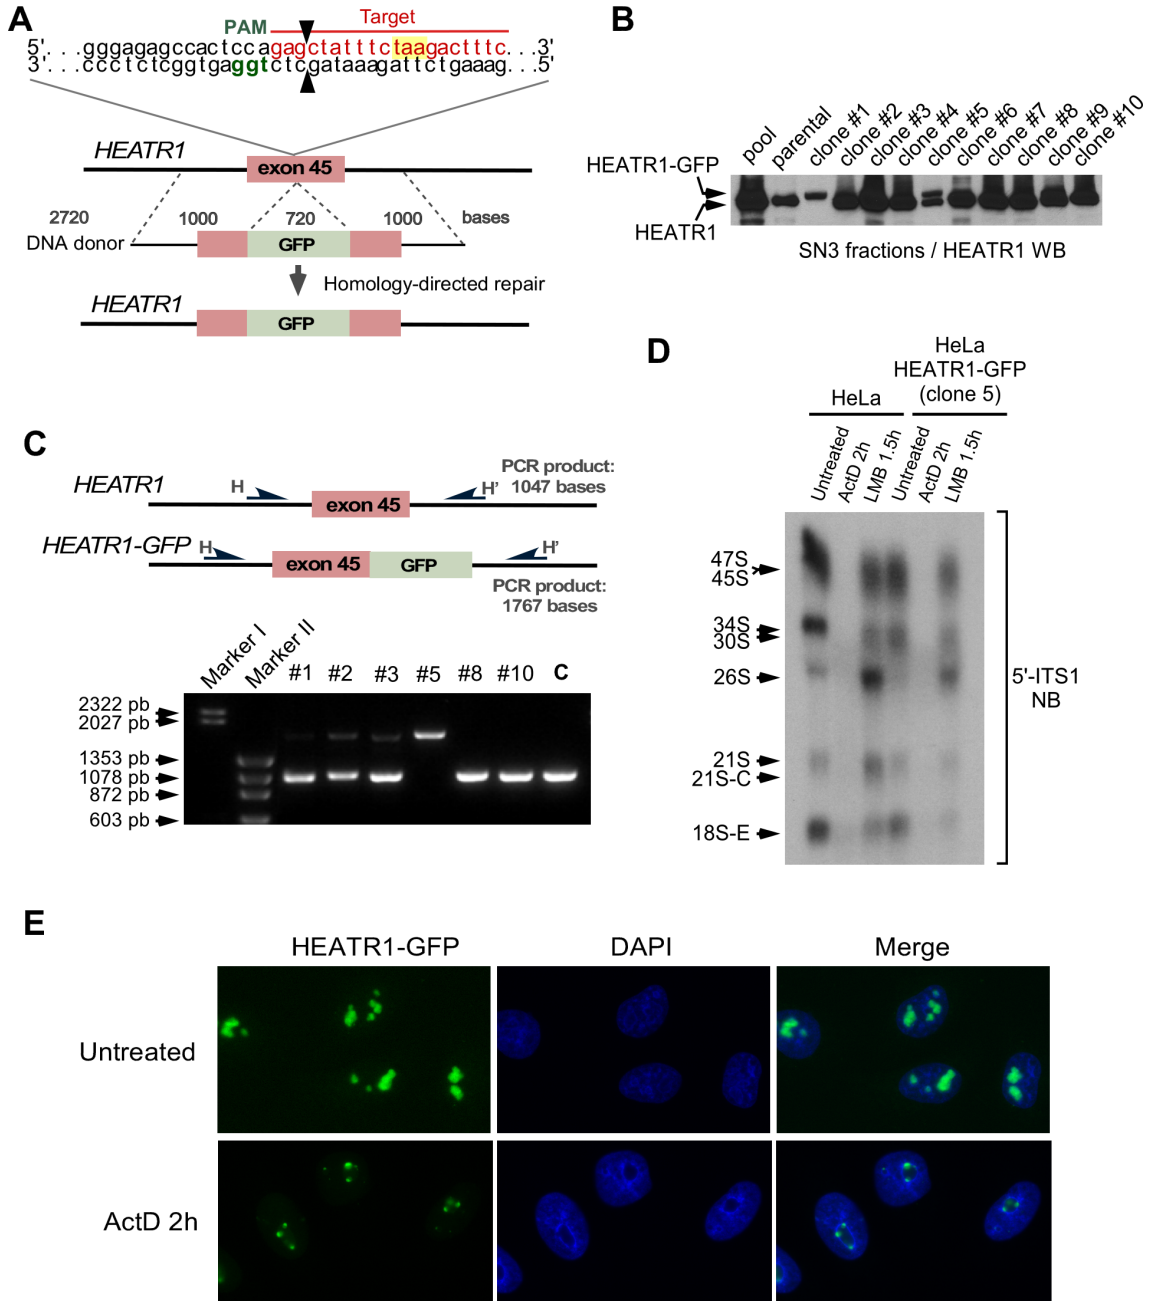

**Figure S1. Generation of a HeLa-derived cell line that endogenously expresses HEATR1-GFP.** (A) Scheme showing the CRISPR strategy used to edit the *HEATR1* locus. The sequence targeted by the gRNA (in red), the protospacer adjacent motif (PAM) sequence (in green), the STOP codon (in yellow), the cleavage site (arrows) and the resulting knock-in product are shown. Sizes (bp) of the GFP sequence, left arm and right arm in the donor repair cassette are also indicated. (B, C) Western blot and PCR analyses of GFP-positive HeLa-derived clones selected after CRISPR-mediated gene editing. Cells of clone #5 express both GFP-fused and non-fused HEATR1. (D) Northern blot analyses showing the relative contents of 18S pre-rRNA species in the selected clone #5, in untreated and in ActD- and LMB- treated cells. The pre-rRNAs profiles of the gene-edited clones are similar to those observed in the parental HeLa line. (E) Subcellular distribution of HEATR1-GFP in gene-edited cells (clone #5) untreated and treated with ActD for 2 h. The protein is nucleolar and localizes to the nucleolar caps upon ActD treatment, which indicates that it is present in the dense fibrillar component (as expected for a component of the UTP-A subcomplex). The normal PSE fractionation profile and interaction with RBFs and the 30S pre-rRNA (Figs. 2B and 2D) also indicate that HEATR1-GFP is properly recruited to primary pre-40S ribosomes.

Figure S2

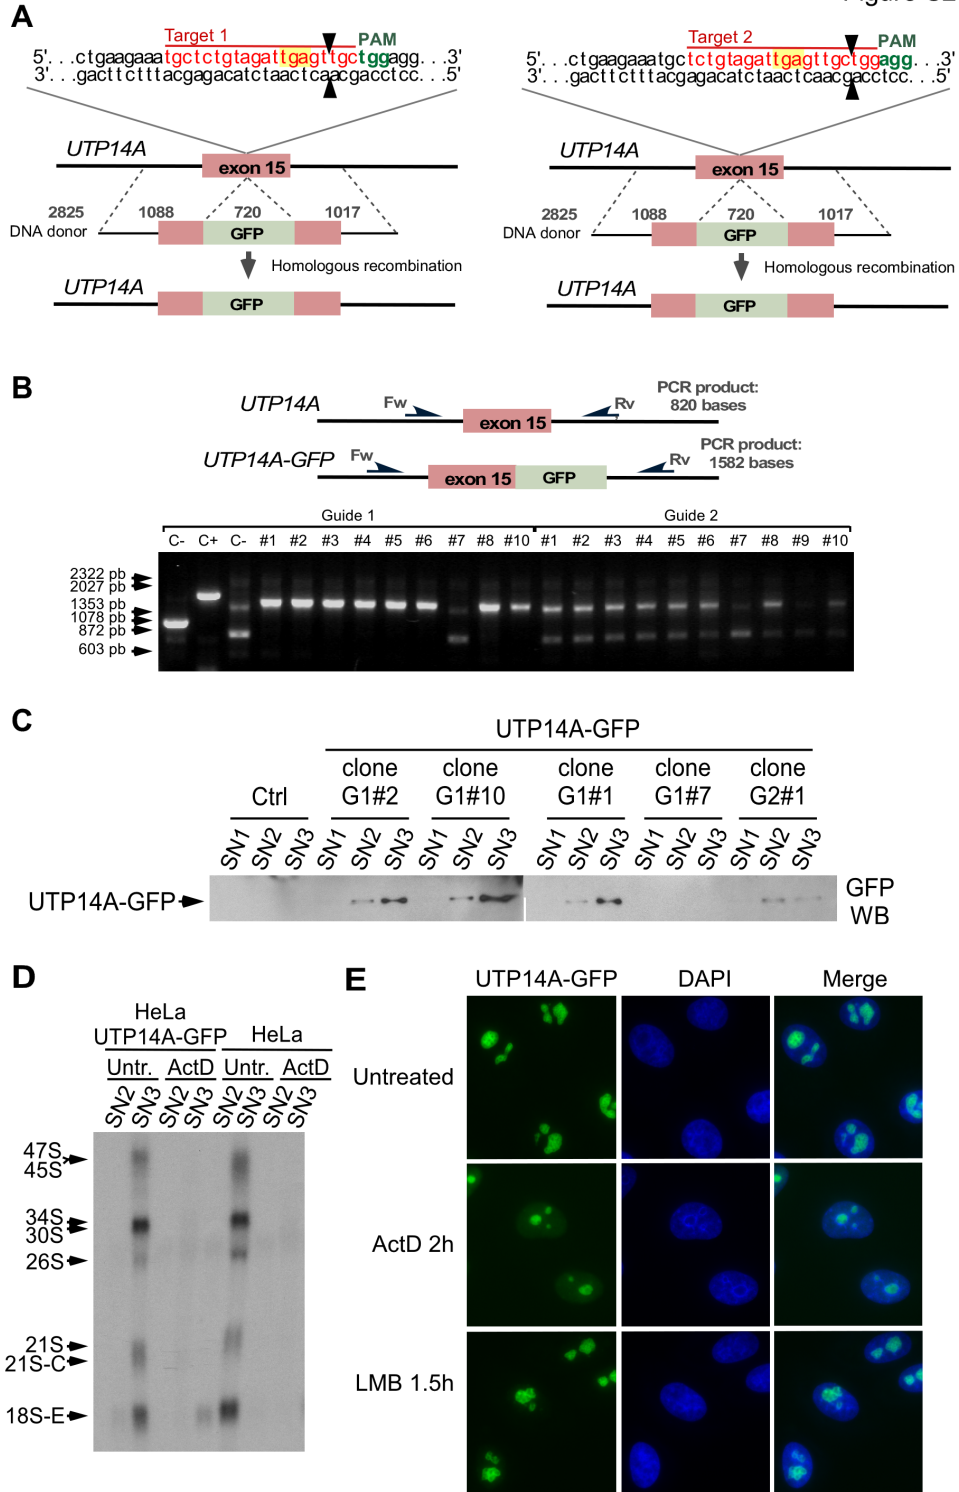

**Figure S2. Generation of a HeLa-derived cell line that endogenously expresses UTP14A-GFP.** (A) Scheme showing the CRISPR strategy used to edit the *UTP14A* locus. Two independent gRNAs were tried. The sequence targeted by the gRNA (in red), the protospacer adjacent motif (PAM) sequence (in green), the STOP codon (in yellow), the cleavage site (arrows) and the resulting knock-in product are shown. Sizes (bp) of the GFP sequence, left arm and right arm in the donor repair cassette are also indicated. (B) PCR analyses of GFP-positive HeLa-derived clones selected after CRISPR-mediated gene editing. (C) PSE fractionation profiles of three clones (G1#2, G1#10, G1#1) that, based on the PCR analyses, have the GFP knock-in introduced in all alleles of *UTP14A*. Two other clones with partial knock-ins were also analyzed. (D) Northern blot analyses showing the relative contents of 18S pre-rRNA species in the selected clone #10, in untreated and in ActD- and LMB- treated cells. The pre-rRNAs profiles of the gene-edited clone are similar to those observed in the parental HeLa line. (E) Subcellular distribution of UTP14A-GFP in the gene-edited selected cell line (clone #10) untreated and treated with ActD and LMB for the indicated times. The protein is nucleolar and remains in the nucleolar interior, excluded from the nucleolar caps, upon ActD treatment. This result is consistent with the protein's presence in the granular component of the nucleolus, which is the expected localization for UTP14A. The normal localization, PSE fractionation profile and growth of cells in the absence of the wild-type protein indicate that the UTP14-GFP fusion is fully functional.

**Supplementary Table 1. Plasmids used in this study**

| <b>Name</b> | <b>Description</b>                                                                          | <b>Use</b>                                            | <b>Reference</b>                                         |
|-------------|---------------------------------------------------------------------------------------------|-------------------------------------------------------|----------------------------------------------------------|
| pX330       | pX330-U6-Chimeric_BB-CBh-hSpCas9                                                            | Generation of Cas9/sg plasmids                        | Feng Zhang generous deposit at Addgene (plasmid # 42230) |
| pBN62       | pX330-sg1CHEATR1                                                                            | GFP knock-in at HEATR1 C-terminus (Cas9/sg plasmid)   | This study                                               |
| pHEATR1-HDR | pMA-gHEATR1(Chr.1: 236551904 - 236550905)-GFP-gHEATR1(Chr.1: 236550904 - 236549902)         | GFP knock-in at HEATR1 C-terminus (HDR donor plasmid) | This study (GeneArt, Invitrogen)                         |
| pSG10       | pX330-sg1CUTP14A                                                                            | GFP knock-in at UTP14A C-terminus (Cas9/sg plasmid)   | This study                                               |
| pSG12       | pBluescript-gUTP14A (Chr.X: 129928518 - 129929605)-GFP-gUTP14C (Chr.X: 129929606-129930626) | GFP knock-in at UTP14A C-terminus (HDR donor plasmid) | This study                                               |

**Supplementary Table 2. Oligonucleotides used in this study**

| No | Description       | Sequence                                           | Use                                                              |
|----|-------------------|----------------------------------------------------|------------------------------------------------------------------|
| 1  | sgHEATR1 GUIDE1 F | CACCGGAAAGTCTTAGAAATAGCTC                          | Generation of Cas9/sg plasmid for <i>HEATR1</i> edition          |
| 2  | sgHEATR1 GUIDE1 R | AAACGAGCTATTTCTAAGACTTTCC                          | Generation of Cas9/sg plasmid for <i>HEATR1</i> edition          |
| 3  | gHEATR1 F2        | GCCAAAAGACTATTCAGCAACTGG                           | Confirmation of GFP insertion at C-terminal end of <i>HEATR1</i> |
| 4  | gHEATR1 R2        | GCCTTTTGCTTGCCACATTTCTGC                           | Confirmation of GFP insertion at C-terminal end of <i>HEATR1</i> |
| 5  | sgCUTP14A F1      | CACCGTGCTCTGTAGATTGAGTTGC                          | Generation of Cas9/sg plasmid for <i>UTP14A</i> edition          |
| 6  | sgCUTP14A R1      | AAACGCAACTCAATCTACAGAGCAC                          | Generation of Cas9/sg plasmid for <i>UTP14A</i> edition          |
| 7  | gUTP14A F1        | CTGACATGCTAGCGGCTGAGGCGGGTGGATCAG AGGTCAGG         | Generation of HDR donor for <i>UTP14A</i> edition                |
| 8  | gUTP14A R1        | CCAATGCCCGGGGCATCTACAGAGCATTCTTCAG CTGTTTTTTGTGACG | Generation of HDR donor for <i>UTP14A</i> edition                |
| 9  | gUTP14A F2        | CTGACATAAGCTTGAGTTGCTGGAGGAGTGACAG CCAGGAGC        | Generation of HDR donor for <i>UTP14A</i> edition                |
| 10 | gUTP14A R2        | CCAATGGGTACCGGTTTCATAACGTTCAACATATTT TAGAGG        | Generation of HDR donor for <i>UTP14A</i> edition                |
| 11 | gUTP14A F3        | GCAGTGCAGGGTGGTTTTTCAGACC                          | Confirmation of GFP insertion at C-terminal end of <i>HEATR1</i> |
| 12 | gUTP14A R3        | CCTTGTAAGAAAAGGAGGTGGCCC                           | Confirmation of GFP insertion at C-terminal end of <i>HEATR1</i> |
| 13 | 5'-ITS1           | CCTCGCCCTCCGGGCTCCGGGCTCCGTTAATGATC                | Northern blot probe                                              |

**Supplementary Table 3. siRNAs used in this study**

| siRNA   | Gene Symbol   | Gene name                                       | Gene ID | siRNA ID         | Sense siRNA Sequence  | Source/Reference  |
|---------|---------------|-------------------------------------------------|---------|------------------|-----------------------|-------------------|
| si-ctrl |               | Silencer Select Negative Control No.1           |         |                  |                       | Ambion / #4390843 |
| UTP14A  | <i>UTP14A</i> | U3 small nucleolar ribonucleoprotein, holomog A | 10813   | s21250           | GGCCCAUGGAGUUUCUGAAtt | Ambion / #4392420 |
| PWP2    | <i>PWP2</i>   | PWP2 periodic tryptophan protein homolog        | 5822    | s11611           | GAACCGAAGAAAAAUGACAtt | Ambion / #4392420 |
| RPL5-1  | <i>RPL5</i>   | Ribosomal protein L5                            | 6125    | Custom (AD89JPV) | GGUUGGCCUGACAAAUUAUtt | Ambion / #4390827 |
| RPL5-2  | <i>RPL5</i>   | Ribosomal protein L5                            | 6125    | Custom (ADAAYVO) | CUACCACUGGCAAUAAAGUtt | Ambion / #4390827 |
| RPS6    | <i>RPS6</i>   | Ribosomal protein S6                            | 6194    | Custom (ADBJW1W) | GAAAGCCCUUAAAUAAGAtt  | Ambion / #4390827 |



**Supplementary Table 4. Antibodies used in this study**

| <b>Antibody</b> | <b>Raised in</b> | <b>Use</b>   | <b>Source / Reference</b>      |
|-----------------|------------------|--------------|--------------------------------|
| ENP1            | Rabbit           | Western blot | Bethyl / A304-568A             |
| Fibrillarin     | Rabbit           | Western blot | Santa Cruz (H-140) / sc-25397  |
| GFP             | Mouse            | Western blot | Clontech / 632381              |
| HEATR1          | Mouse            | Western blot | Santa Cruz (B-11) / sc-390445  |
| Histone H3      | Rabbit           | Western blot | Abcam / ab1791                 |
| LTV1            | Rabbit           | Western blot | Sigma / HPA030161              |
| PCNA            | Mouse            | Western blot | Abcam (PC10) / ab29            |
| p53             | Mouse            | Western blot | Cell Signaling (1C12) / #2524  |
| RIO2            | Rabbit           | Western blot | Novus Biologicals / NBP1-30098 |
| RRP12           | Mouse            | Western blot | Santa Cruz (A-3) / sc-398593   |
| RPL11           | Rabbit           | Western blot | Abcam / ab79352                |
| RPL5            | Rabbit           | Western blot | Bethyl / A303-933A             |
| RPS6            | Rabbit           | Western blot | Bethyl / A300-557A             |
| TBL3            | Rabbit           | Western blot | Sigma / HPA042562              |
| Tubulin         | Mouse            | Western blot | Calbiochem / CP06              |
